# Supplementary material for: Enhanced Viral Activity in the Surface Microlayer of the Arctic and Antarctic Oceans
Source: PubMed Central journal article supplement (PMC7913828; doi:10.3390/microorganisms9020317), 2021-02-04
Supplement: microorganisms-09-00317-s001.pdf [file microorganisms-09-00317-s001.pdf]

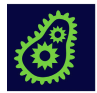

---

# Supplementary Materials: Enhanced Viral Activity in the Surface Microlayer of the Arctic and Antarctic Oceans

Dolors Vaqué <sup>1,\*</sup>, Julia A. Boras <sup>1,†</sup>, Jesús María Arrieta <sup>2</sup>, Susana Agustí <sup>3</sup>, Carlos M. Duarte <sup>3</sup> and Maria Montserrat Sala <sup>1</sup>

**Publisher's Note:** MDPI stays neutral with regard to jurisdictional claims in published maps and institutional affiliations.

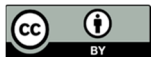

**Copyright:** © 2021 by the authors. Submitted for possible open access publication under the terms and conditions of the Creative Commons Attribution (CC BY) license (<http://creativecommons.org/licenses/by/4.0/>).

**Table S1.** Pearson correlation coefficient among all variables in the surface microlayer (SML) and in the subsurface microlayer (SSW) of the Arctic sea water. Significant values are in bold.

| SML     | VA            | PA           | VPR           | PHP           | VPL          | RLC           | %VMM         | HNF           | PNF           | Temp         | Sal          | DOC           | PO4           | SiO4         | NO3/NO2      | NH4          | Wind          | UVB          |
|---------|---------------|--------------|---------------|---------------|--------------|---------------|--------------|---------------|---------------|--------------|--------------|---------------|---------------|--------------|--------------|--------------|---------------|--------------|
| VA      | -             | <b>0.621</b> | <b>0.434</b>  | -0.05         | -0.01        | <b>0.630</b>  | 0.257        | 0.142         | 0.241         | <b>0.436</b> | 0.290        | <b>0.798</b>  | <b>0.567</b>  | <b>0.703</b> | 0.071        | 0.355        | <b>-0.512</b> | 0.386        |
| PA      | <b>0.621</b>  |              | -0.361        | 0.376         | 0.089        | <b>0.784</b>  | 0.416        | 0.223         | 0.224         | 0.248        | <b>0.480</b> | <b>0.633</b>  | <b>0.485</b>  | <b>0.690</b> | <b>0.422</b> | 0.251        | -0.114        | 0.237        |
| VPR     | <b>0.434</b>  | -0.361       |               | <b>-0.483</b> | -0.158       | 0.325         | 0.104        | -0.091        | -0.028        | -0.154       | -0.279       | 0.014         | 0.113         | 0.073        | -0.271       | 0.124        | -0.306        | 0.254        |
| PHP     | -0.05         | 0.376        | <b>-0.483</b> |               | 0.012        | 0.142         | 0.270        | <b>-0.536</b> | 0.315         | 0.068        | 0.035        | 0.320         | -0.092        | 0.146        | 0.326        | 0.355        | 0.205         | -0.004       |
| VPL     | -0.01         | 0.089        | -0.158        | 0.012         |              | -0.032        | -0.197       | 0.071         | -0.113        | 0.240        | 0.176        | -0.119        | 0.142         | -0.052       | <b>0.892</b> | 0.345        | 0.124         | 0.318        |
| RLC     | <b>0.630</b>  | <b>0.784</b> | 0.325         | 0.142         | -0.032       |               | <b>0.890</b> | 0.178         | 0.097         | 0.128        | -0.001       | <b>0.568</b>  | 0.315         | 0.504        | 0.316        | 0.359        | <b>-0.798</b> | 0.342        |
| %VMM    | 0.257         | 0.416        | 0.104         | 0.270         | -0.197       | <b>0.890</b>  |              | -0.052        | -0.152        | -0.322       | -0.364       | 0.245         | -0.129        | 0.171        | 0.157        | 0.061        | -0.519        | 0.135        |
| HNF     | 0.142         | 0.223        | -0.091        | <b>-0.536</b> | 0.071        | 0.178         | -0.052       |               | <b>-0.578</b> | 0.292        | 0.001        | -0.466        | 0.329         | -0.166       | 0.059        | -0.262       | -0.283        | -0.202       |
| PNF     | 0.241         | 0.224        | -0.028        | 0.315         | -0.113       | 0.097         | -0.152       | <b>-0.578</b> |               | 0.306        | 0.407        | <b>0.593</b>  | 0.404         | <b>0.686</b> | 0.229        | 0.394        | -0.088        | 0.410        |
| Temp    | <b>0.436</b>  | 0.248        | -0.154        | 0.068         | 0.240        | 0.128         | -0.322       | 0.292         | 0.306         |              | <b>0.593</b> | <b>0.442</b>  | <b>0.767</b>  | <b>0.435</b> | 0.214        | 0.303        | -0.379        | <b>0.539</b> |
| Sal     | 0.290         | <b>0.480</b> | -0.279        | 0.035         | 0.176        | -0.001        | -0.364       | 0.001         | 0.407         | <b>0.593</b> |              | 0.390         | <b>0.560</b>  | <b>0.542</b> | 0.259        | 0.269        | 0.059         | 0.221        |
| DOC     | <b>0.798</b>  | <b>0.633</b> | 0.014         | 0.320         | -0.119       | <b>0.568</b>  | 0.245        | -0.466        | <b>0.593</b>  | <b>0.442</b> | 0.390        |               | 0.415         | <b>0.889</b> | 0.335        | <b>0.486</b> | <b>-0.471</b> | 0.261        |
| PO4     | <b>0.567</b>  | <b>0.485</b> | 0.113         | -0.092        | 0.142        | 0.315         | -0.129       | 0.329         | 0.404         | <b>0.767</b> | <b>0.560</b> | 0.415         |               | <b>0.632</b> | 0.388        | 0.345        | <b>-0.531</b> | 0.309        |
| SiO4    | <b>0.703</b>  | <b>0.690</b> | 0.073         | 0.146         | -0.052       | 0.504         | 0.171        | -0.166        | <b>0.686</b>  | <b>0.435</b> | <b>0.542</b> | <b>0.889</b>  | <b>0.632</b>  |              | 0.301        | 0.259        | -0.255        | 0.278        |
| NO3/NO2 | 0.071         | <b>0.422</b> | -0.271        | 0.326         | <b>0.892</b> | 0.316         | 0.157        | 0.059         | 0.229         | 0.214        | 0.259        | 0.335         | 0.388         | 0.301        |              | 0.266        | -0.045        | -0.020       |
| NH4     | 0.355         | 0.251        | 0.124         | 0.355         | 0.345        | 0.359         | 0.061        | -0.262        | 0.394         | 0.303        | 0.269        | <b>0.486</b>  | 0.345         | 0.259        | 0.266        | -            | -0.076        | 0.280        |
| Wind    | <b>-0.512</b> | -0.114       | -0.306        | 0.205         | 0.124        | <b>-0.798</b> | -0.519       | -0.283        | -0.088        | -0.379       | 0.059        | <b>-0.471</b> | <b>-0.531</b> | -0.255       | -0.045       | -0.076       |               | 0.240        |
| UVB     | 0.386         | 0.237        | 0.254         | -0.004        | 0.318        | 0.342         | 0.135        | -0.202        | 0.410         | <b>0.539</b> | 0.221        | 0.261         | 0.309         | 0.278        | -0.020       | 0.280        | 0.240         |              |

| SSW | VA           | PA            | VPR           | PHP    | VPL    | RLC   | %VMM         | HNF    | PNF          | Temp   | Sal          | DOC   | PO4    | SiO4         | NO3/NO2       | NH4    | Wind   | UVB    |
|-----|--------------|---------------|---------------|--------|--------|-------|--------------|--------|--------------|--------|--------------|-------|--------|--------------|---------------|--------|--------|--------|
| VA  |              | 0.253         | <b>0.562</b>  | 0.165  | 0.217  | 0.197 | 0.147        | -0.160 | 0.306        | 0.269  | 0.081        | 0.089 | -0.101 | 0.226        | -0.286        | 0.015  | -0.152 | 0.391  |
| PA  | 0.253        |               | <b>-0.626</b> | 0.386  | 0.459  | 0.194 | -0.214       | 0.364  | 0.288        | 0.300  | <b>0.496</b> | 0.135 | 0.329  | <b>0.613</b> | <b>0.489</b>  | -0.023 | -0.031 | 0.184  |
| VPR | <b>0.562</b> | <b>-0.626</b> |               | -0.201 | 0.147  | 0.007 | 0.165        | -0.446 | -0.002       | -0.254 | 0.395        | 0.046 | -0.365 | -0.358       | <b>-0.646</b> | -0.102 | -0.093 | 0.123  |
| PHP | 0.165        | 0.386         | -0.201        |        | -0.070 | 0.455 | <b>0.709</b> | -0.098 | <b>0.585</b> | 0.226  | 0.130        | 0.218 | 0.033  | 0.108        | 0.274         | -0.262 | 0.304  | -0.264 |

|                |        |              |               |              |              |              |               |               |              |              |              |               |              |              |              |        |              |
|----------------|--------|--------------|---------------|--------------|--------------|--------------|---------------|---------------|--------------|--------------|--------------|---------------|--------------|--------------|--------------|--------|--------------|
| <b>VPL</b>     | 0.217  | 0.459        | 0.147         | -0.070       | <b>0.701</b> | -0.076       | -0.166        | 0.426         | 0.248        | 0.064        | 0.231        | 0.285         | 0.574        | 0.474        | 0.585        | -0.441 | 0.594        |
| <b>RLC</b>     | 0.197  | 0.194        | 0.007         | 0.455        | <b>0.701</b> | <b>0.568</b> | -0.140        | 0.382         | -0.071       | -0.210       | 0.280        | -0.402        | 0.306        | 0.105        | 0.057        | -0.395 | <b>0.890</b> |
| <b>%VMM</b>    | 0.147  | -0.214       | 0.165         | <b>0.709</b> | -0.076       | <b>0.568</b> | -0.022        | 0.064         | -0.250       | -0.367       | 0.148        | <b>-0.926</b> | -0.179       | -0.353       | -0.538       | -0.085 | 0.661        |
| <b>HNF</b>     | -0.160 | 0.364        | -0.446        | -0.098       | -0.166       | -0.140       | -0.022        | <b>-0.508</b> | 0.316        | 0.103        | -0.373       | 0.257         | -0.180       | 0.067        | 0.119        | -0.199 | -0.090       |
| <b>PNF</b>     | 0.306  | 0.288        | -0.002        | <b>0.585</b> | 0.426        | 0.382        | 0.064         | <b>-0.508</b> | 0.228        | <b>0.524</b> | <b>0.675</b> | 0.191         | <b>0.731</b> | <b>0.546</b> | -0.239       | 0.219  | <b>0.586</b> |
| <b>Temp</b>    | 0.269  | 0.300        | -0.254        | 0.226        | 0.248        | -0.071       | -0.250        | 0.316         | 0.228        | <b>0.761</b> | 0.204        | <b>0.523</b>  | <b>0.423</b> | 0.124        | 0.159        | -0.285 | 0.423        |
| <b>Sal</b>     | 0.081  | <b>0.496</b> | 0.395         | 0.130        | 0.064        | -0.210       | -0.367        | 0.103         | <b>0.524</b> | <b>0.761</b> | 0.295        | <b>0.517</b>  | <b>0.704</b> | 0.354        | 0.071        | 0.071  | 0.242        |
| <b>DOC</b>     | 0.089  | 0.135        | 0.046         | 0.218        | 0.231        | 0.280        | 0.148         | -0.373        | <b>0.675</b> | 0.204        | 0.295        | 0.115         | 0.368        | 0.263        | 0.263        | -0.177 | 0.418        |
| <b>PO4</b>     | -0.101 | 0.329        | -0.365        | 0.033        | 0.285        | -0.402       | <b>-0.926</b> | 0.257         | 0.191        | <b>0.523</b> | <b>0.517</b> | 0.115         | 0.323        | <b>0.519</b> | <b>0.474</b> | -0.127 | -0.144       |
| <b>SiO4</b>    | 0.226  | <b>0.613</b> | -0.358        | 0.108        | 0.574        | 0.306        | -0.179        | -0.180        | <b>0.731</b> | 0.423        | <b>0.704</b> | 0.368         | 0.323        | <b>0.522</b> | -0.009       | 0.090  | 0.460        |
| <b>NO3/NO2</b> | -0.286 | <b>0.489</b> | <b>-0.646</b> | 0.274        | 0.474        | 0.105        | -0.353        | 0.067         | <b>0.546</b> | 0.124        | 0.354        | 0.263         | <b>0.519</b> | <b>0.522</b> | 0.258        | -0.039 | -0.052       |
| <b>NH4</b>     | 0.015  | -0.023       | -0.102        | -0.262       | 0.585        | 0.057        | -0.538        | 0.119         | -0.239       | 0.159        | 0.071        | -0.038        | <b>0.474</b> | -0.009       | 0.258        | 0.005  | 0.341        |
| <b>Wind</b>    | -0.152 | -0.031       | -0.093        | 0.304        | -0.441       | -0.395       | -0.085        | -0.199        | 0.219        | -0.285       | 0.071        | -0.177        | -0.127       | 0.090        | -0.049       | 0.005  | 0.360        |
| <b>UVB</b>     | 0.391  | 0.184        | 0.123         | -0.264       | 0.594        | <b>0.890</b> | 0.661         | -0.090        | <b>0.586</b> | 0.423        | 0.242        | 0.418         | -0.144       | 0.460        | -0.052       | 0.341  | 0.360        |

**Table S2.** Pearson correlation coefficient among all variables in the surface microlayer (SML) and in the subsurface microlayer (SSW) of Antarctic sea water. Significant values are in bold.

| SML         | VA           | PA           | VPR          | PHP          | VPL          | RLC          | %VMM   | HNF          | PNF          | Temp | Sal | DOC | PO4           | SiO4          | NO3/NO2       | NH4   | Wind          | UVB           |
|-------------|--------------|--------------|--------------|--------------|--------------|--------------|--------|--------------|--------------|------|-----|-----|---------------|---------------|---------------|-------|---------------|---------------|
| <b>VA</b>   | -            | <b>0.517</b> | <b>0.906</b> | <b>0.665</b> | <b>0.636</b> | <b>0.874</b> | 0.289  | 0.441        | 0.327        | -    | -   | -   | <b>-0.593</b> | -0.368        | -0.204        | 0.142 | <b>-0.423</b> | <b>-0.627</b> |
| <b>PA</b>   | <b>0.517</b> | -            | 0.107        | 0.365        | <b>0.787</b> | <b>0.700</b> | -0.061 | 0.667        | 0.692        | -    | -   | -   | -0.443        | <b>-0.595</b> | -0.246        | 0.075 | <b>-0.492</b> | -0.399        |
| <b>VPR</b>  | <b>0.906</b> | 0.107        | -            | <b>0.592</b> | 0.470        | <b>0.892</b> | 0.484  | 0.247        | 0.057        | -    | -   | -   | <b>-0.486</b> | 0.152         | -0.089        | 0.141 | -0.249        | -0.500        |
| <b>PHP</b>  | <b>0.665</b> | 0.365        | <b>0.592</b> | -            | 0.468        | <b>0.970</b> | 0.661  | 0.388        | 0.099        | -    | -   | -   | <b>-0.519</b> | -0.345        | <b>-0.518</b> | -     | -0.284        | <b>-0.607</b> |
| <b>VPL</b>  | <b>0.636</b> | <b>0.787</b> | 0.470        | 0.468        | -            | 0.569        | -0.023 | <b>0.987</b> | 0.767        | -    | -   | -   | -0.422        | -0.397        | -             | 0.088 | -0.643        | -0.703        |
| <b>RLC</b>  | <b>0.874</b> | <b>0.700</b> | <b>0.892</b> | <b>0.970</b> | 0.569        | -            | 0.669  | 0.466        | 0.109        | -    | -   | -   | -0.420        | -0.395        | -             | -     | <b>-0.815</b> | -0.599        |
| <b>%VMM</b> | 0.289        | -0.061       | 0.484        | 0.661        | -0.023       | 0.669        | -      | 0.001        | -0.543       | -    | -   | -   | 0.294         | 0.268         | -             | -     | -0.600        | -0.415        |
| <b>HNF</b>  | 0.441        | 0.667        | 0.247        | 0.388        | <b>0.987</b> | 0.466        | 0.001  | -            | <b>0.801</b> | -    | -   | -   | -0.299        | -0.273        | -             | -     | -0.584        | -0.431        |
| <b>PNF</b>  | 0.327        | 0.692        | 0.057        | 0.099        | 0.767        | 0.109        | -0.543 | <b>0.801</b> | -            | -    | -   | -   | -0.549        | -0.527        | -             | -     | -0.242        | 0.805         |

|                |               |               |               |               |        |               |        |        |        |   |   |   |              |              |        |        |        |        |
|----------------|---------------|---------------|---------------|---------------|--------|---------------|--------|--------|--------|---|---|---|--------------|--------------|--------|--------|--------|--------|
| <b>Temp</b>    | -             | -             | -             | -             | -      | -             | -      | -      | -      | - | - | - | -            | -            | -      | -      | -      | -      |
| <b>Sal</b>     | -             | -             | -             | -             | -      | -             | -      | -      | -      | - | - | - | -            | -            | -      | -      | -      | -      |
| <b>DOC</b>     | -             | -             | -             | -             | -      | -             | -      | -      | -      | - | - | - | -            | -            | -      | -      | -      | -      |
| <b>PO4</b>     | <b>-0.593</b> | -0.443        | <b>-0.486</b> | <b>-0.519</b> | -0.422 | -0.420        | 0.294  | -0.299 | -0.549 | - | - | - | -            | -            | -      | -      | 0.084  | 0.110  |
| <b>SiO4</b>    | -0.368        | <b>-0.595</b> | 0.152         | -0.345        | -0.397 | -0.395        | 0.268  | -0.273 | -0.527 | - | - | - | <b>0.860</b> | -            | -      | -      | 0.063  | -0.109 |
| <b>NO3+NO2</b> | -0.204        | -0.246        | -0.089        | <b>-0.518</b> | -      | -             | -      | -      | -      | - | - | - | <b>0.865</b> | <b>0.747</b> | -      | -      | -0.045 | 0.562  |
| <b>NH4</b>     | 0.142         | 0.075         | 0.141         | -             | 0.088  | -             | -      | -      | -      | - | - | - | 0.186        | -0.004       | -0.290 | -      | -0.361 | -0.506 |
| <b>Wind</b>    | <b>-0.423</b> | <b>-0.492</b> | -0.249        | -0.284        | -0.643 | <b>-0.815</b> | -0.600 | -0.584 | -0.242 | - | - | - | 0.084        | 0.063        | -0.045 | -0.361 | -      | 0.226  |
| <b>UVB</b>     | <b>-0.627</b> | -0.399        | -0.500        | <b>-0.607</b> | -0.703 | -0.599        | -0.415 | -0.431 | 0.805  | - | - | - | 0.110        | -0.109       | 0.562  | -0.506 | -      | 0.226  |

| SSW            | VA            | PA           | VPR           | PHP          | VPL    | RLC          | %VMM          | HNF           | PNF           | Temp         | Sal           | DOC           | PO4          | SiO4         | NO3+NO2      | NH4           | Wind          | UVB           |
|----------------|---------------|--------------|---------------|--------------|--------|--------------|---------------|---------------|---------------|--------------|---------------|---------------|--------------|--------------|--------------|---------------|---------------|---------------|
| <b>VA</b>      |               | 0.309        | <b>0.934</b>  | 0.329        | 0.342  | 0.241        | -0.167        | 0.487         | -0.009        | -0.043       | <b>-0.505</b> | <b>0.542</b>  | -0.377       | -0.129       | -0.003       | 0.093         | <b>-0.508</b> | <b>-0.704</b> |
| <b>PA</b>      | 0.309         |              | 0.024         | <b>0.577</b> | 0.512  | 0.392        | -0.021        | 0.244         | -0.224        | <b>0.445</b> | 0.240         | -0.141        | -0.227       | -0.328       | -0.009       | -0.391        | -0.369        | -0.222        |
| <b>VPR</b>     | <b>0.934</b>  | 0.024        |               | 0.133        | 0.272  | 0.180        | -0.219        | 0.569         | 0.070         | -0.217       | <b>-0.645</b> | <b>0.647</b>  | -0.320       | -0.014       | 0.040        | 0.284         | <b>-0.406</b> | <b>-0.715</b> |
| <b>PHP</b>     | 0.329         | <b>0.577</b> | 0.133         |              | -0.119 | -0.250       | -0.481        | <b>0.932</b>  | 0.608         | 0.044        | -0.224        | 0.291         | -0.140       | -0.289       | -0.174       | 0.283         | 0.000         | -0.517        |
| <b>VPL</b>     | 0.342         | 0.512        | 0.272         | -0.119       |        | 0.313        | 0.111         | -0.210        | -0.264        | -0.420       | 0.229         | 0.282         | -0.350       | -0.215       | 0.718        | 0.835         | -0.098        | 0.506         |
| <b>RLC</b>     | 0.241         | 0.392        | 0.180         | -0.250       | 0.313  |              | <b>0.912</b>  | -0.581        | <b>0.898</b>  | -0.091       | -0.066        | 0.422         | -0.307       | -0.238       | 0.142        | -0.133        | 0.339         | 0.656         |
| <b>%VMM</b>    | -0.167        | -0.021       | -0.219        | -0.481       | 0.111  | <b>0.912</b> |               | -0.672        | <b>-0.867</b> | -0.092       | -0.171        | 0.104         | -0.058       | -0.100       | -0.059       | 0.107         | 0.545         | 0.787         |
| <b>HNF</b>     | 0.487         | 0.244        | 0.569         | <b>0.932</b> | -0.210 | -0.581       | -0.672        |               | <b>0.811</b>  | -0.194       | -0.197        | 0.499         | -0.524       | -0.400       | -0.179       | 0.342         | <b>-0.918</b> | -0.842        |
| <b>PNF</b>     | -0.009        | -0.224       | 0.070         | 0.608        | -0.264 | <b>0.898</b> | <b>-0.867</b> | <b>0.811</b>  |               | -0.210       | -0.197        | -0.030        | -0.119       | -0.151       | -0.253       | 0.318         | -0.700        | -0.626        |
| <b>Temp</b>    | -0.043        | <b>0.445</b> | -0.217        | 0.044        | -0.420 | -0.091       | -0.092        | -0.194        | -0.210        |              | 0.336         | -0.241        | <b>0.425</b> | 0.369        | 0.419        | 0.021         | -0.070        | -0.417        |
| <b>Sal</b>     | <b>-0.505</b> | 0.240        | <b>-0.645</b> | -0.224       | 0.229  | -0.066       | -0.171        | -0.197        | -0.197        | 0.336        |               | <b>-0.697</b> | 0.126        | 0.106        | -0.013       | <b>-0.874</b> | 0.270         | 0.261         |
| <b>DOC</b>     | <b>0.542</b>  | -0.141       | <b>0.647</b>  | 0.291        | 0.282  | 0.422        | 0.104         | 0.499         | -0.030        | -0.241       | <b>-0.697</b> |               | -0.112       | 0.097        | 0.079        | -0.189        | -0.045        | -0.231        |
| <b>PO4</b>     | -0.377        | -0.227       | -0.320        | -0.140       | -0.350 | -0.307       | -0.058        | -0.524        | -0.119        | <b>0.425</b> | 0.126         | -0.112        |              | <b>0.781</b> | <b>0.935</b> | 0.065         | <b>0.400</b>  | 0.094         |
| <b>SiO4</b>    | -0.129        | -0.328       | -0.014        | -0.289       | -0.215 | -0.238       | -0.100        | -0.400        | -0.151        | 0.369        | 0.106         | 0.097         | <b>0.781</b> |              | <b>0.784</b> | -0.167        | 0.312         | -0.226        |
| <b>NO3+NO2</b> | -0.003        | -0.009       | 0.040         | -0.174       | 0.718  | 0.142        | -0.059        | -0.179        | -0.253        | 0.419        | -0.013        | 0.079         | <b>0.935</b> | <b>0.784</b> |              | -0.050        | 0.242         | 0.129         |
| <b>NH4</b>     | 0.093         | -0.391       | 0.284         | 0.283        | -0.835 | -0.133       | 0.107         | 0.342         | 0.318         | 0.021        | <b>-0.874</b> | -0.189        | 0.065        | -0.167       | -0.050       |               | -0.094        | -0.296        |
| <b>Wind</b>    | <b>-0.508</b> | -0.369       | <b>-0.406</b> | 0.000        | -0.098 | 0.339        | 0.545         | <b>-0.918</b> | -0.700        | -0.070       | 0.270         | -0.045        | <b>0.400</b> | 0.312        | 0.242        | 0.094         |               | 0.226         |

---

|            |               |        |               |        |       |       |       |        |        |        |       |        |       |        |       |        |       |
|------------|---------------|--------|---------------|--------|-------|-------|-------|--------|--------|--------|-------|--------|-------|--------|-------|--------|-------|
| <b>UVB</b> | <b>-0.704</b> | -0.222 | <b>-0.715</b> | -0.517 | 0.506 | 0.656 | 0.787 | -0.842 | -0.626 | -0.417 | 0.261 | -0.231 | 0.094 | -0.226 | 0.129 | -0.296 | 0.226 |
|------------|---------------|--------|---------------|--------|-------|-------|-------|--------|--------|--------|-------|--------|-------|--------|-------|--------|-------|
